# Supplementary material
Source: publisher site journal article supplement (https://www.dovepress.com/article/169941)
Supplement: Supplementary file 1 [file get_supplementary_file.php]

# Supplemental List 1

IRB or IEC (name/address) , center name, and date of final approval

| IRB or IEC (name/address)                                                                                                                  | Center                                                                         | Date of Final Approval<br>(DD/MMM/YYYY) |
|--------------------------------------------------------------------------------------------------------------------------------------------|--------------------------------------------------------------------------------|-----------------------------------------|
| <p>The IRB of Hokkaido University Hospital</p> <p>5, Kita 14-jo Nishi, Kita-ku<br/>Hokkaido, Sapporo<br/>060-8648<br/>Japan</p>            | Hokkaido University Hospital, First Department of Medicine                     | 17/MAR/2015                             |
| <p>The IRB of Teine Keijinkai Hospital</p> <p>12-1-40, Maeda 1-jo Teineku<br/>Hokkaido, Sapporo<br/>006-0811<br/>Japan</p>                 | Teine Keijinkai Clinic, Respiratory Medicine                                   | 02/MAR/2015                             |
| <p>The IRB of Oji General Hospital</p> <p>3-4-8, Wakakusa-cho<br/>Hokkaido, Tomakomai<br/>053-8506<br/>Japan</p>                           | Oji General Hospital, Department of Respiratory Medicine                       | 24/FEB/2015                             |
| <p>The IRB of Medical Corporation Choryo Idaimae Minamiyojo Int Clinic</p> <p>15-1-32, Minami 4-jo Nishi Chuo-ku<br/>Hokkaido, Sapporo</p> | Medical Corporation Choryo Idaimae Minamiyojo Int Clinic, Respiratory Medicine | 24/FEB/2015                             |

| IRB or IEC (name/address)                                                                                                                                        | Center                                                                                     | Date of Final Approval<br>(DD/MMM/YYYY) |
|------------------------------------------------------------------------------------------------------------------------------------------------------------------|--------------------------------------------------------------------------------------------|-----------------------------------------|
| 064-0804<br>Japan                                                                                                                                                |                                                                                            |                                         |
| The IRB of Tohoku Medical and Pharmaceutical<br>University Wakabayashi Hospital<br><br>2-29-1, Yamatomachi Wakabayashi-ku<br>Miyagi, Sendai<br>984-8560<br>Japan | Tohoku Medical and Pharmaceutical University<br>Wakabayashi Hospital, Respiratory Medicine | 21/APR/2015                             |
| The IRB of Makita Hospital<br><br>2-6-25, Shinkotoni 1-jo, Kita-ku<br>Hokkaido, Sapporo<br>001-0901<br>Japan                                                     | Makita Hospital, Respiratory                                                               | 26/FEB/2015                             |
| The IRB of Makita Hospital<br><br>2-6-25, Shinkotoni 1-jo, Kita-ku<br>Hokkaido, Sapporo<br>001-0901<br>Japan                                                     | Mikami Internal and Respiratory Medicine Clinic,<br>Respiratory Medicine                   | 26/FEB/2015                             |
| The IRB of Koizumi Clinic of Respiratory and Internal<br>Medicine<br><br>27-1-41, Minami 1-jo Nishi, Chuo-ku<br>Hokkaido, Sapporo                                | Koizumi Clinic of Respiratory and Internal<br>Medicine, Respiratory                        | 09/FEB/2015                             |

| IRB or IEC (name/address)                                                                                                                                    | Center                                                                                                          | Date of Final Approval<br>(DD/MMM/YYYY) |
|--------------------------------------------------------------------------------------------------------------------------------------------------------------|-----------------------------------------------------------------------------------------------------------------|-----------------------------------------|
| 064-0801<br>Japan                                                                                                                                            |                                                                                                                 |                                         |
| The IRB of Obihiro Kokyukika Naika Hospital<br><br>20-1, Higashi-5-jo Minami<br>Hokkaido, Obihiro<br>080-0805<br>Japan                                       | Obihiro Kokyukika Naika Hospi, Respiratory                                                                      | 16/FEB/2015                             |
| The IRB of National Hospital Organization Asahikawa Medical Center<br><br>7-4048, Hanasaki-cho<br>Hokkaido, Asahikawa<br>070-8644<br>Japan                   | National Hospital Organization Asahikawa Medical center,r, Clinical Trial Center, Clinical Research Coordinator | 16/FEB/2015                             |
| The IRB of Japan Community Health care Organization Hokkaido Hospital<br><br>8-3-18, Nakanoshima 1-jo, Toyohira-ku<br>Hokkaido, Sapporo<br>062-8618<br>Japan | Japan Community Health care Organization Hokkaido Hospital                                                      | 12/FEB/2015                             |
| The IRB of Hakodate Goryoukaku Hospital<br><br>38-3, Goryokaku-cho<br>Hokkaido, Hakodate                                                                     | Hakodate Goryoukaku Hospital,,Clinical Trial Center, Respiratotry                                               | 25/MAR/2015                             |

| IRB or IEC (name/address)                                                                                                                              | Center                                                                     | Date of Final Approval<br>(DD/MMM/YYYY) |
|--------------------------------------------------------------------------------------------------------------------------------------------------------|----------------------------------------------------------------------------|-----------------------------------------|
| 040-8611<br>Japan                                                                                                                                      |                                                                            |                                         |
| The IRB of Hakodate Municipal Hospital<br>1-10-1, Minato-cho<br>Hokkaido, Hakodate<br>041-8680<br>Japan                                                | Hakodate Municipal Hospital,Clinical Trial Center,<br>Respiratotry         | 19/FEB/2015                             |
| The IRB of Koizumi Clinic of Respiratory and Internal<br>Medicine<br><br>27-1-41, Minami 1-jo Nishi, Chuo-ku<br>Hokkaido, Sapporo<br>064-0801<br>Japan | Ohmichi Internal medicine and Respiratory Clinic,<br>Respiratory           | 09/FEB/2015                             |
| The IRB of Hokkaido P.W.F.A.C Obihiro-Kosei General<br>Hospital<br><br>8-1, Minami, Nishi 6-jo<br>Hokkaido, Obihiro<br>080-0016<br>Japan               | Hokkaido P.W.F.A.C Obihiro-Kosei General<br>Hospital, Respiratory Medicine | 25/MAR/2015                             |
| The IRB of Otaru Kyokai Hospital<br><br>1-6-15, Suminoe<br>Hokkaido, Otaru<br>047-8510                                                                 | Otaru Kyokai Hospital, respiratory                                         | 25/FEB/2015                             |

| IRB or IEC (name/address)                                                                                                   | Center                                                                                         | Date of Final Approval<br>(DD/MMM/YYYY) |
|-----------------------------------------------------------------------------------------------------------------------------|------------------------------------------------------------------------------------------------|-----------------------------------------|
| Japan                                                                                                                       |                                                                                                |                                         |
| The IRB of KKR Sapporo Medical Center<br><br>6-3-40, Hiragishi 1-jyo, Toyohira-ku<br>Hokkaido, Sapporo<br>062-0931<br>Japan | KKR Sapporo Medical Center, Drug department                                                    | 26/FEB/2015                             |
| The IRB of Iwate Medical University Hospital<br><br>19-1, Uchimaru<br>Iwate, Morioka<br>020-8505<br>Japan                   | Iwate Medical University Hospital, Division of<br>Pulmonary Medicine, Allergy and Rheumatology | 19/FEB/2015                             |
| The IRB of Tohoku University Hospital<br><br>1-1, Seiryō-machi, Aoba-ku<br>Miyagi, Sendai<br>980-8574<br>Japan              | Tohoku University Hospital, Department of<br>Respiratory Medicine                              | 23/FEB/2015                             |
| The IRB of Tohoku Rosai Hospital<br><br>4-3-21, Dainohara, Aoba-ku<br>Miyagi, Sendai<br>981-8563<br>Japan                   | Japan Organization of Occupational Health and<br>Safety Tohoku Rosai Hospital                  | 12/MAR/2015                             |

| IRB or IEC (name/address)                                                                                                                      | Center                                                                                   | Date of Final Approval<br>(DD/MMM/YYYY) |
|------------------------------------------------------------------------------------------------------------------------------------------------|------------------------------------------------------------------------------------------|-----------------------------------------|
| The IRB of Sanyudo Hospital<br><br>6-1-219, Chuo<br>Yamagata, Yonezawa<br>992-0045<br>Japan                                                    | Sanyudo Hospital, Respiratory Medicine                                                   | 10/MAR/2015                             |
| The IRB of Fukushima Medical University Hospital<br><br>1, Hikarigaoka<br>Fukushima, Fukushima<br>960-1295<br>Japan                            | Fukushima Medical University Hospital, Pulmonary<br>Medicine                             | 04/MAR/2015                             |
| The IRB of Ibarakihigashi National Hospital<br><br>825, Terunuma, Tokai-mura<br>Ibaraki, Naka-gun<br>319-1113<br>Japan                         | National Hospital Organization Ibarakihigashi<br>National Hospital, Respiratory Medicine | 19/FEB/2015                             |
| The IRB of Review Board of Human Rights and Ethics for<br>Clinical Studies<br><br>13-2, Ichiban-cho,<br>Tokyo, Chiyoda-ku<br>102-0082<br>Japan | Hitachi, Ltd. Hitachinaka General Hospital,<br>Respiratory Medicine                      | 03/MAR/2015                             |

| IRB or IEC (name/address)                                                                                                                                 | Center                                                                           | Date of Final Approval<br>(DD/MMM/YYYY) |
|-----------------------------------------------------------------------------------------------------------------------------------------------------------|----------------------------------------------------------------------------------|-----------------------------------------|
| <p>The IRB of Outpatient, Fujioka General Hospital</p> <p>813-1, Nakakurusu<br/>Gunma, Fujioka<br/>375-0015<br/>Japan</p>                                 | <p>Outpatient, Fujioka General Hospital, Respiratory<br/>Diseases Department</p> | <p>25/FEB/2015</p>                      |
| <p>The IRB of Review Board of Human Rights and Ethics for<br/>Clinical Studies</p> <p>13-2, Ichiban-cho,<br/>Tokyo, Chiyoda-ku<br/>102-0082<br/>Japan</p> | <p>Tsuchiya Clinic, internal medicine</p>                                        | <p>20/FEB/2015</p>                      |
| <p>The IRB of Maebashi Red Cross Hospital</p> <p>3-21-36, Asahi-cho<br/>Gunma, Maebashi<br/>371-0014<br/>Japan</p>                                        | <p>Maebashi Red Cross Hospital, Respiratory medicine</p>                         | <p>23/FEB/2015</p>                      |
| <p>The IRB of Review Board of Human Rights and Ethics for<br/>Clinical Studies</p> <p>13-2, Ichiban-cho,<br/>Tokyo, Chiyoda-ku<br/>102-0082<br/>Japan</p> | <p>Okano Clinic, Internal Medicine</p>                                           | <p>20/FEB/2015</p>                      |

| IRB or IEC (name/address)                                                                                         | Center                                              | Date of Final Approval<br>(DD/MMM/YYYY) |
|-------------------------------------------------------------------------------------------------------------------|-----------------------------------------------------|-----------------------------------------|
| The IRB of Saitama Red Cross Hospital<br><br>8-3-33, Kamiochiai, Chuo-ku<br>Saitama, Saitama<br>338-8553<br>Japan | Saitama Red Cross Hospital, Internal Medicine       | 03/MAR/2015                             |
| The IRB of Chiba University Hospital<br><br>1-8-1, Inohana, Chuo-ku<br>Chiba, Chiba<br>260-8677<br>Japan          | Chiba University Hospital, Respiratory Medicine     | 16/MAR/2015                             |
| The IRB of Tesshokai<br><br>929, Higashi-cho<br>Chiba, Kamogawa<br>296-0041<br>Japan                              | Kameda Clinic, Respiratory                          | 17/FEB/2015                             |
| The IRB of The Jikei University Hospital<br><br>3-19-18, Nishishinbashi<br>Tokyo, Minato-ku<br>105-8471<br>Japan  | The Jikei University Hospital, Respiratory Medicine | 24/FEB/2015                             |
| The IRB of Tokyo Medical University Hospital                                                                      | Tokyo Medical University Hospital, Respiratory      | 09/MAR/2015                             |



| IRB or IEC (name/address)                                                                                                          | Center                                                           | Date of Final Approval<br>(DD/MMM/YYYY) |
|------------------------------------------------------------------------------------------------------------------------------------|------------------------------------------------------------------|-----------------------------------------|
| 6-7-1, Nishishinjuku<br>Tokyo, Shinjuku-ku<br>160-0023<br>Japan                                                                    | Medicine                                                         |                                         |
| The IRB of National Hospital Organization Tokyo Medical Center<br><br>2-5-1, Higashigaoka<br>Tokyo, Meguro-ku<br>152-8902<br>Japan | National Hospital Organization Tokyo Medical Center, Respiratory | 16/FEB/2015                             |
| The IRB of Nihon University Itabashi Hospital<br><br>30-1, Oyaguchi, Kami-cho<br>Tokyo, Itabashi-ku<br>173-8610<br>Japan           | Nihon University Itabashi Hospital, Respiratory Medicine         | 24/FEB/2015                             |
| Tokyo-Eki Center-building Clinic<br><br>3-3-14, Nihonbashi<br>Tokyo, Chuo-ku<br>103-0027<br>Japan                                  | Tokyo-Eki Center-building Clinic, Internal Medicine              | 17/FEB/2015                             |
| The IRB of Sendai                                                                                                                  | Hikarigaoka Spellman Hospital, Department of Internal Medicine   | 10/MAR/2015                             |

| IRB or IEC (name/address)                                                                                                  | Center                                                                                         | Date of Final Approval<br>(DD/MMM/YYYY) |
|----------------------------------------------------------------------------------------------------------------------------|------------------------------------------------------------------------------------------------|-----------------------------------------|
| 7-22-8, Sakuragaoka, Aoba-ku,<br>Miyagi, Sendai<br>983-0833<br>Japan                                                       |                                                                                                |                                         |
| The IRB of Tokyo Medical University Hachioji Medical Center<br><br>1163, Tatemachi<br>Tokyo, Hachioji<br>193-0998<br>Japan | Tokyo Medical University Hachioji Medical Center,<br>Respiratory                               | 26/FEB/2015                             |
| The IRB of Tokyo-Eki Center-building Clinic<br><br>3-3-14, Nihonbashi<br>Tokyo, Chuo-ku<br>103-0027<br>Japan               | Fukuwa Clinic                                                                                  | 17/FEB/2015                             |
| The IRB of Keio University Hospital<br><br>35, Shinanomachi<br>Tokyo, Shinjuku-ku<br>160-8582<br>Japan                     | Keio University Hospital, Division of Pulmonary<br>Medicine                                    | 26/FEB/2015                             |
| The IRB of Center Hospital of the National Center for<br>Global Health and Medicine                                        | Center Hospital of the National Center for Global<br>Health and Medicine, Respiratory Medicine | 19/FEB/2015                             |

| IRB or IEC (name/address)                                                                                                                                                   | Center                                                                                                                                                       | Date of Final Approval<br>(DD/MMM/YYYY) |
|-----------------------------------------------------------------------------------------------------------------------------------------------------------------------------|--------------------------------------------------------------------------------------------------------------------------------------------------------------|-----------------------------------------|
| 1-21-1, Toyama<br>Tokyo, Shinjuku-ku<br>162-8655<br>Japan                                                                                                                   |                                                                                                                                                              |                                         |
| The IRB of Teikyo University Hospital<br><br>2-11-1, Kaga<br>Tokyo, Itabashi-ku<br>173-8606<br>Japan                                                                        | Teikyo University Hospital, Internal Medicine                                                                                                                | 24/FEB/2015                             |
| The IRB of Federation of National Public Service<br>Personnel Mutual Aid Associations Tachikawa Hospital<br><br>4-2-22, Nishikicho<br>Tokyo, Tachikawa<br>190-8531<br>Japan | Federation of National Public Service Personnel<br>Mutual Aid Associations Tachikawa Hospital,<br>Clinical Research Center, Clinical Research<br>Coordinator | 02/MAR/2015                             |
| The IRB of Koto Hospital<br><br>6-8-5, Ojima<br>Tokyo, Koto-ku<br>136-0072<br>Japan                                                                                         | Koto Hospital, Department of Respiratory medicine                                                                                                            | 09/MAR/2015                             |
| The IRB of Sakayori Clinic                                                                                                                                                  | Sakayori Clinic, Clinical Trial Center, Clinical<br>Research Coordinator                                                                                     | 16/FEB/2015                             |

| IRB or IEC (name/address)                                                                                                                           | Center                                                                                | Date of Final Approval<br>(DD/MMM/YYYY) |
|-----------------------------------------------------------------------------------------------------------------------------------------------------|---------------------------------------------------------------------------------------|-----------------------------------------|
| 2-26-3, Higashioi<br>Tokyo, Shinagawa-ku<br>140-0011<br>Japan                                                                                       |                                                                                       |                                         |
| The IRB of Asai Dermatology Clinic<br><br>1-14, Katabira-cho, Hodogaya-ku,<br>Kanagawa, Yokohama<br>240-0013<br>Japan                               | Healthcare corporation Aigokai Kanamecho<br>Hospital, Respiratory department          | 16/FEB/2015                             |
| The IRB of Kanagawa Cardiovascular and Respiratory<br>Center<br><br>6-16-1, Tomioka-higashi, Kanazawa-ku<br>Kanagawa, Yokohama<br>236-0051<br>Japan | Kanagawa Cardiovascular and Respiratory Center,<br>Department of Respiratory medicine | 10/MAR/2015                             |
| The IRB of Tokai University Hospital<br><br>143, Shimokasuya<br>Kanagawa, Isehara<br>259-1193<br>Japan                                              | Tokai University Hospital, Respiratory                                                | 25/FEB/2015                             |
| The IRB of Yokohama City University Medical Center                                                                                                  | Yokohama City University Medical Center,<br>Respiratory Disease Center                | 10/APR/2015                             |

| IRB or IEC (name/address)                                                                                                                     | Center                                                                                                                       | Date of Final Approval<br>(DD/MMM/YYYY) |
|-----------------------------------------------------------------------------------------------------------------------------------------------|------------------------------------------------------------------------------------------------------------------------------|-----------------------------------------|
| 4-57, Urafune-cho, Minami-ku<br>Kanagawa, Yokohama<br>232-0024<br>Japan                                                                       |                                                                                                                              |                                         |
| The IRB of Kokan Clinic<br><br>1-2-3, Kokandori, Kawasaki-ku<br>Kanagawa, Kawasaki<br>210-0852<br>Japan                                       | Medical corporation kokankai kokan clinic, Internal<br>Medicine                                                              | 03/FEB/2015                             |
| The IRB of St. Marianna University School of Medicine<br>Hospital<br><br>2-16-1, Sugao, Miyamae-ku<br>Kanagawa, Kawasaki<br>216-8511<br>Japan | St. Marianna University School of Medicine<br>Hospital, Internal Medicine Division of Respiratory<br>and Infectious Diseases | 16/MAR/2015                             |
| The IRB of Yokohama Minoru Clinic<br><br>1-13-8, Bessho, Minami-ku<br>Kanagawa, Yokohama<br>232-0064<br>Japan                                 | Shinada Respiratory and Cardiovascular Clinic,<br>Respiratory                                                                | 12/FEB/2015                             |
| The IRB of Teikyo University Hospital, Mizonokuchi                                                                                            | Teikyo University Hospital, Mizonokuchi, Clinical<br>Trial Center                                                            | 14/APR/2015                             |

| IRB or IEC (name/address)                                                                                                | Center                                                                                                                | Date of Final Approval<br>(DD/MMM/YYYY) |
|--------------------------------------------------------------------------------------------------------------------------|-----------------------------------------------------------------------------------------------------------------------|-----------------------------------------|
| 3-8-3, Mizonokuchi, Takatsu-ku<br>Kanagawa, Kawasaki<br>213-8507<br>Japan                                                |                                                                                                                       |                                         |
| The IRB of Sagamihara National Hospital<br><br>18-1, Sakuradai, Minami-ku<br>Kanagawa, Sagamihara<br>252-0392<br>Japan   | National Hospital Organization Sagamihara National<br>Hospital, Allergology                                           | 18/FEB/2015                             |
| The IRB of Nishi-Niigata Chuo National Hospital<br><br>1-14-1, Masago, Nishi-ku<br>Niigata, Niigata<br>950-2085<br>Japan | Nishi-Niigata Chuo National Hospital, Respiratory<br>Medicine                                                         | 18/FEB/2015                             |
| The IRB of Niigata Rinko Hospital<br><br>1-114-3, Momoyamacho, Higashi-ku<br>Niigata, Niigata<br>950-0051<br>Japan       | Niigata Rinko Hospital, Internal Medicine<br>Respiratory,                                                             | 23/FEB/2015                             |
| The IRB of Niigata University Medical and Dental<br>Hospital                                                             | Niigata University Medical & Dental Hospital,<br>Internal Medicine Division of Respiratory and<br>infectious Diseases | 24/FEB/2015                             |

| IRB or IEC (name/address)                                                                                     | Center                                           | Date of Final Approval<br>(DD/MMM/YYYY) |
|---------------------------------------------------------------------------------------------------------------|--------------------------------------------------|-----------------------------------------|
| 754, Asahimachidori 1-bancho, Chuo-ku<br>Niigata, Niigata<br>951-8520<br>Japan                                |                                                  |                                         |
| The IRB of Kanazawa Municipal Hospital<br><br>3-7-3, Heiwamachi<br>Ishikawa, Kanazawa<br>921-8105<br>Japan    | Kanazawa Municipal Hospital, Respiratory         | 13/MAR/2015                             |
| The IRB of Fukui Prefectural Hospital<br><br>2-8-1, Yotsui<br>Fukui, Fukui<br>910-8526<br>Japan               | Fukui Prefectural Hospital, Respiratory Medicine | 04/FEB/2015                             |
| The IRB of Yokohama Minoru Clinic<br><br>1-13-8, Bessho, MINAMI-ku<br>Kanagawa, Yokohama<br>232-0064<br>Japan | Okubo Chest Clinic, Respiratory and Medicine     | 12/FEB/2015                             |
| The IRB of Review Board of Human Rights and Ethics for<br>Clinical Studies                                    | Koyama Medical Clinic, Internal Medicine         | 20/FEB/2015                             |

| IRB or IEC (name/address)                                                                                     | Center                                                                             | Date of Final Approval<br>(DD/MMM/YYYY) |
|---------------------------------------------------------------------------------------------------------------|------------------------------------------------------------------------------------|-----------------------------------------|
| 13-2, Ichiban-cho,<br>Tokyo, Chiyoda-ku<br>102-0082<br>Japan                                                  |                                                                                    |                                         |
| The IRB of Shinshu University Hospital<br><br>3-1-1, Asahi<br>Nagano, Matsumoto<br>390-8621<br>Japan          | Shinshu University Hospital, Respiriology &<br>Infectious Disease                  | 28/APR/2015                             |
| The IRB of Ogaki Municipal Hospital<br><br>4-86, Minaminokawacho<br>Gifu, Ogaki<br>503-8502<br>Japan          | Ogaki Municipal Hospital, Respiratory Medicine                                     | 26/FEB/2015                             |
| The IRB of Clinical Research Tokyo Hospital<br><br>3-87-4, Haramachi,<br>Tokyo, Shinjuku<br>162-0053<br>Japan | Tohno Chuo Clinic, Internal Medicine                                               | 26/FEB/2015                             |
| The IRB of Tenryu Hospital                                                                                    | National Hospital Organization Tenryu Hospital,<br>Department of Internal Medicine | 20/FEB/2015                             |



| IRB or IEC (name/address)                                                                                                                                      | Center                                                                                        | Date of Final Approval<br>(DD/MMM/YYYY) |
|----------------------------------------------------------------------------------------------------------------------------------------------------------------|-----------------------------------------------------------------------------------------------|-----------------------------------------|
| 4201-2, Oro Hamakita-ku<br>Shizuoka, Hamamatsu<br>434-8511<br>Japan                                                                                            |                                                                                               |                                         |
| The IRB of Shizuoka Prefectural Hospital Organization<br>Shizuoka General Hospital<br><br>4-27-1, Kita Ando, Aoi-ku<br>Shizuoka, Shizuoka<br>420-8527<br>Japan | Shizuoka Prefectural Hospital Organization<br>Shizuoka General Hospital, Respiratory Medicine | 25/MAR/2015                             |
| The IRB of Tosei General Hospital<br><br>160, Nishioiwake-cho<br>Aichi, Seto<br>489-8642<br>Japan                                                              | Tosei General Hospital, Respiratory Medicine and<br>Allergy                                   | 16/MAR/2015                             |
| The IRB of Nagoya University Hospital<br><br>65, Tsurumai-cho, Showa-ku<br>Aichi, Nagoya<br>466-8560<br>Japan                                                  | Nagoya University Hospital, Respiriology                                                      | 27/MAR/2015                             |
| The IRB of National Hospital for Geriatric Medicine                                                                                                            | National Center for Geriatrics and Gerontology,<br>Department of Pulmonary Medicine           | 19/JUN/2015                             |

| IRB or IEC (name/address)                                                                                                                                     | Center                                                                            | Date of Final Approval<br>(DD/MMM/YYYY) |
|---------------------------------------------------------------------------------------------------------------------------------------------------------------|-----------------------------------------------------------------------------------|-----------------------------------------|
| 7-430, Morioka-cho<br>Aichi, Obu<br>474-0038<br>Japan                                                                                                         |                                                                                   |                                         |
| The IRB of Clinical Research Tokyo Hospital<br><br>3-87-4, Haramachi,<br>Tokyo, Shinjuku<br>162-0053<br>Japan                                                 | Hiramatsu Internal & Respiratory Medecine Clinic,<br>Respiratory                  | 26/FEB/2015                             |
| The IRB of Japan Organization of Occupational Health and<br>Safety Chubu Rosai Hospital<br><br>1-10-6, Komei, Minato-ku<br>Aichi, Nagoya<br>455-8530<br>Japan | Japan Organization of Occupational Health and<br>Safety Chubu Rosai Hospital      | 16/FEB/2015                             |
| The IRB of Japan Community Health care Organization<br>Chukyo Hospital<br><br>1-1-10, Sanjo, Minami-ku<br>Aichi, Nagoya<br>457-8510<br>Japan                  | Japan Community Health care Organization Chukyo<br>Hospital, Respiratory Medicine | 26/FEB/2015                             |
| The IRB of The Nippon Medical School                                                                                                                          | The Respiratory Care Clinic, Nippon Medical<br>School, Internal Medicine          | 26/FEB/2015                             |

| IRB or IEC (name/address)                                                                                          | Center                                                                                  | Date of Final Approval<br>(DD/MMM/YYYY) |
|--------------------------------------------------------------------------------------------------------------------|-----------------------------------------------------------------------------------------|-----------------------------------------|
| 4-7-15, Kudan-minami<br>Tokyo, Chiyoda-ku<br>102-0074<br>Japan                                                     |                                                                                         |                                         |
| The IRB of Matsusaka City Hospital<br><br>1550, Tonomachi<br>Mie, Matsusaka<br>515-8544<br>Japan                   | Matsusaka City Hospital, Respiratory Medicine                                           | 06/FEB/2015                             |
| The IRB of Kyoto University Hospital<br><br>54, Shogoin-Kawaharacho, Sakyo-ku<br>Kyoto, Kyoto<br>606-8507<br>Japan | Kyoto University Hospital, Respiratory Medicine                                         | 18/MAR/2015                             |
| The IRB of Kindai University Hospital<br><br>377-2, Onohigashi<br>Osaka, Osakasayama<br>589-8511<br>Japan          | Kinki University Hospital, Faculty of Medicine,<br>Respiratory Medicine and Allergology | 23/MAR/2015                             |
| The IRB of Osaka City University Hospital<br><br>1-5-7, Asahimachi, Abeno-ku                                       | Osaka City University Hospital, Department of<br>respiratory Medicine                   | 25/FEB/2015                             |

| IRB or IEC (name/address)                                                                                        | Center                                                         | Date of Final Approval<br>(DD/MMM/YYYY) |
|------------------------------------------------------------------------------------------------------------------|----------------------------------------------------------------|-----------------------------------------|
| Osaka, Osaka<br>545-8586<br>Japan                                                                                |                                                                |                                         |
| The IRB of Osaka Red Cross Hospital<br><br>5-30, Fudegasaki-cho, Tennoji-ku<br>Osaka, Osaka<br>543-8555<br>Japan | Osaka Red Cross Hospital, Respiratory                          | 01/APR/2015<br>01/APR/2015              |
| The IRB of Takatsuki Red Cross Hospital<br><br>1-1-1, Abuno<br>Osaka, Takatsuki<br>569-1096<br>Japan             | Takatsuki Red Cross Hospital, Respiratory Division             | 20/FEB/2015                             |
| The IRB of Kishiwada City Hospital<br><br>1001, Gakuhara-cho<br>Osaka, Kishiwada<br>596-8501<br>Japan            | Kishiwada City Hospital, Department of Respiratory<br>Medicine | 16/FEB/2015                             |
| The IRB of Tomisaka Clinic<br><br>1-33-9, Hongo,<br>Tkyo, Bunkyo                                                 | Sasaki naika clinic, Respiratory medicine                      | 04/FEB/2015                             |

| IRB or IEC (name/address)                                                                                                              | Center                                                                             | Date of Final Approval<br>(DD/MMM/YYYY) |
|----------------------------------------------------------------------------------------------------------------------------------------|------------------------------------------------------------------------------------|-----------------------------------------|
| 113-0033<br>Japan                                                                                                                      |                                                                                    |                                         |
| The IRB of National Hospital Organization Toneyama<br>National Hospital<br><br>5-1-1, Toneyama<br>Osaka, Toyonaka<br>560-8552<br>Japan | National Hospital Organization Toneyama National<br>Hospital, Respiratory medicine | 20/FEB/2015                             |
| The IRB of Osaka Saiseikai Nakatsu Hospital<br><br>2-10-39, Shibata, Kita-ku<br>Osaka, Osaka<br>530-0012<br>Japan                      | Osaka Saiseikai Nakatsu Hospital , Respiratory<br>Medicine                         | 03/MAR/2015                             |
| The IRB of Tokushukai Group<br><br>1-8-7, Kojimachi<br>Tokyo, Chiyoda<br>581-0011<br>Japan                                             | Yao Tokushukai General Hospital, The internal<br>department                        | 23/FEB/2015                             |
| The IRB of Japan Community Health care Organization<br>Osaka Hospital<br><br>4-2-78, Fukushima, Fukusima-ku                            | Japan Community Health care Organization Osaka<br>Hospital, Internal Medicine      | 17/FEB/2015                             |

| IRB or IEC (name/address)                                                                                                                                                | Center                                                                              | Date of Final Approval<br>(DD/MMM/YYYY) |
|--------------------------------------------------------------------------------------------------------------------------------------------------------------------------|-------------------------------------------------------------------------------------|-----------------------------------------|
| Osaka, Osaka<br>553-0003<br>Japan                                                                                                                                        |                                                                                     |                                         |
| The IRB of Ikeda Municipal Hospital<br><br>3-1-18, Jonan<br>Osaka, Ikeda<br>563-8510<br>Japan                                                                            | Ikeda Municipal Hospital, Respiratory Medicine                                      | 02/FEB/2015                             |
| The IRB of National Hospital Organization Himeji<br>Medical Center<br><br>68, Honmachi<br>Hyogo, Himeji<br>670-8520<br>Japan                                             | National Hospital Organization Himeji Medical<br>Center, Respiratory tract medicine | 25/FEB/2015                             |
| The IRB of Kobe City Hospital Organization Kobe City<br>Medical Center General Hospital<br><br>2-1-1, Minatojimaminamimachi, Chuo-ku<br>Hyogo, Kobe<br>650-0047<br>Japan | Kobe City Medical Center General Hospital,<br>Respiratory Medicine                  | 09/MAR/2015                             |
| The IRB of Hyogo College of Medicine Hospital<br><br>1-1, Mukogawacho                                                                                                    | Hyogo College Of Medicine College Hospital,<br>Respiratory                          | 25/MAR/2015                             |

| IRB or IEC (name/address)                                                                                                    | Center                                                                                                       | Date of Final Approval<br>(DD/MMM/YYYY) |
|------------------------------------------------------------------------------------------------------------------------------|--------------------------------------------------------------------------------------------------------------|-----------------------------------------|
| Hyogo, Nishinomiya<br>663-8501<br>Japan                                                                                      |                                                                                                              |                                         |
| The IRB of Nakatani Hospital<br><br>2501, Hosoe, Shikama-ku<br>Hyogo, Himeji<br>672-8064<br>Japan                            | Nakatani Hospital, Internal Medicine                                                                         | 19/FEB/2015                             |
| The IRB of Nara Hospital Kinki University Faculty of<br>Medicine<br><br>1248-1, Otodacho<br>Nara, Ikoma<br>630-0293<br>Japan | Nara Hospital Kinki University Faculty of Medicine,<br>Department of Respiratory Medicine and<br>Allergology | 10/APR/2015                             |
| The IRB of Wakayama Medical University Hospital<br><br>811-1, Kimiidera<br>Wakayama, Wakayama<br>641-8510<br>Japan           | Wakayama Medical University Hospital, Third<br>Department of Internal Medicine                               | 24/FEB/2015                             |
| The IRB of Wakayama National Hospital<br><br>1138, Oazawada, Mihama-cho                                                      | Wakayama National Hospital, Respiratory Medicine,<br>Department of pharmacy, Shuji Masamichi                 | 12/MAR/2015                             |

| IRB or IEC (name/address)                                                                                                         | Center                                                                                                       | Date of Final Approval<br>(DD/MMM/YYYY) |
|-----------------------------------------------------------------------------------------------------------------------------------|--------------------------------------------------------------------------------------------------------------|-----------------------------------------|
| Wakayama, Hidaka-gun<br>644-0044<br>Japan                                                                                         |                                                                                                              |                                         |
| The IRB of Shimane University Hospital<br><br>89-1, Enya-cho<br>Shimane, Izumo<br>693-8501<br>Japan                               | Shimane University Hospital, Division of Medical<br>Oncology and Respiratory Medicine                        | 12/FEB/2015                             |
| The IRB of Shimane Prefectural Central Hospital<br><br>4-1-1, Himebara<br>Shimane, Izumo<br>693-8555<br>Japan                     | Shimane Prefectural Central Hospital, Respiratory                                                            | 19/FEB/2015                             |
| The IRB of Kawasaki Hospital , Kawasaki Medical School<br><br>2-1-80, Nakasange, Kita-ku<br>Okayama, Okayama<br>700-8505<br>Japan | Kawasaki Medical School General Medical Center                                                               | 04/MAR/2015                             |
| The IRB of Chugoku Central Hospital<br><br>148-13, Kamiwanari, Miyuki-cho<br>Hiroshima, Fukuyama                                  | Public school building cooperative association<br>Chugoku central hospital, Respiratory internal<br>medicine | 17/MAR/2015                             |



| IRB or IEC (name/address)                                                                                                                              | Center                                                                                                                             | Date of Final Approval<br>(DD/MMM/YYYY) |
|--------------------------------------------------------------------------------------------------------------------------------------------------------|------------------------------------------------------------------------------------------------------------------------------------|-----------------------------------------|
| 720-0001<br>Japan                                                                                                                                      |                                                                                                                                    |                                         |
| The IRB of National Hospital Organization Kure Medical Center and Chugoku Cancer Center<br><br>3-1, Aoyama-cho<br>Hiroshima, Kure<br>737-0023<br>Japan | National Hospital Organization Kure Medical Center and Chugoku Cancer Center, Respiratory medicine                                 | 13/MAR/2015                             |
| The IRB of Kure Kyosai Hospital<br><br>2-3-28, Nishichuo<br>Hiroshima, Kure<br>737-8505<br>Japan                                                       | Federation of National Public Services and Affiliated Personnel Mutual Aid Associations Kure Kyosai Hospital, Respiratory Medicine | 10/FEB/2015                             |
| The IRB of Hiroshima Prefectural Hospital<br><br>1-5-54, Ujinakanda, Minami-ku<br>Hiroshima, Hiroshima<br>734-8530<br>Japan                            | Hiroshima Prefectural Hospital, Respiratory internal medicine                                                                      | 27/FEB/2015                             |
| The IRB of Yokohama Minoru Clinic<br><br>1-13-8, Bessho, Minami-ku<br>Kanagawa, Yokohama                                                               | Sentohill Hospital, Allergology and respiratory medicine                                                                           | 26/FEB/2015                             |

| IRB or IEC (name/address)                                                                                                                | Center                                                                               | Date of Final Approval<br>(DD/MMM/YYYY) |
|------------------------------------------------------------------------------------------------------------------------------------------|--------------------------------------------------------------------------------------|-----------------------------------------|
| 232-0064<br>Japan                                                                                                                        |                                                                                      |                                         |
| The IRB of National Hospital Organization Iwakuni<br>Clinical Center<br><br>1-1-1, Atagomachi<br>Yamaguchi, Iwakuni<br>740-8510<br>Japan | National Hospital Organization Iwakuni Clinical<br>Center, Respiratory Medicine      | 05/FEB/2015                             |
| The IRB of Takamatsu Municipal Hospital<br><br>2-36-1, Miyawaki Cho<br>Kagawa, Takamatsu<br>760-8538<br>Japan                            | Takamatsu Municipal Hospital, Respiratory<br>Medicine                                | 26/FEB/2015                             |
| The IRB of Sakaide City Hospital<br><br>3-1-2, Kotobuki-cho<br>Kagawa, Sakaide<br>762-8550<br>Japan                                      | Sakaide City Hospital, Department of Internal<br>Medicine                            | 27/FEB/2015                             |
| The IRB of Nihonbashi Sakura Clinic<br><br>1-9-2, Kayaba-cho, Nihonbashi,<br>Tokyo, Chuo                                                 | Kamei Internal medicine and Respiratory Clinic,<br>Internal medicine and Respiratory | 18/FEB/2015                             |

| IRB or IEC (name/address)                                                                                                                             | Center                                                                                                                      | Date of Final Approval<br>(DD/MMM/YYYY) |
|-------------------------------------------------------------------------------------------------------------------------------------------------------|-----------------------------------------------------------------------------------------------------------------------------|-----------------------------------------|
| 103-0025<br>Japan                                                                                                                                     |                                                                                                                             |                                         |
| The IRB of Yokohama Minoru Clinic<br><br>1-13-8, Bessho, MInami-ku<br>Kanagawa, Yokohama<br>232-0064<br>Japan                                         | Yokohama Minoru Clinic, Internal medicine,                                                                                  | 12/FEB/2015                             |
| The IRB of Kurume University Hospital<br><br>67, Asahi-machi<br>Fukuoka, Kurume<br>830-0011<br>Japan                                                  | Kurume University, Clinical Trial Center, Division<br>Of Respirology, Neurology And Rheumatology,<br>Department Of Medicine | 16/FEB/2015                             |
| The IRB of K-YOU HEALTH CARE Co. KIRIGAOKA<br>TSUDA HOSPITAL<br><br>3-9-20, Kirigaoka, Kokurakita-ku<br>Fukuoka, Kitakyushu-city<br>802-0052<br>Japan | K-YOU HEALTH CARE Co. KIRIGAOKA<br>TSUDA HOSPITAL, Internal Medicine                                                        | 26/FEB/2015                             |
| The IRB of National Hospital Organization Fukuoka-<br>higashi Medical Center<br><br>1-1-1, Chidori                                                    | National Hospital Organization Fukuoka-higashi<br>Medical Center, Respiratotry                                              | 20/FEB/2015                             |

| IRB or IEC (name/address)                                                                                                                             | Center                                                                              | Date of Final Approval<br>(DD/MMM/YYYY) |
|-------------------------------------------------------------------------------------------------------------------------------------------------------|-------------------------------------------------------------------------------------|-----------------------------------------|
| Fukuoka, Koga<br>811-3195<br>Japan                                                                                                                    |                                                                                     |                                         |
| The IRB of Seiwakai Medical Corporation Nagata Hospital<br><br>523-1, Shimomiyanaga-machi<br>Fukuoka, Yanagawa<br>832-0059<br>Japan                   | Seiwakai Medical Corporation Nagata Hospital,<br>Department of Respiratory Medicine | 16/FEB/2015                             |
| The IRB of Nihonbashi Sakura Clinic<br><br>1-9-2, Kayaba-cho, Nihonbashi,<br>Tokyo, Chuo<br>103-0025<br>Japan                                         | Shin Yukuhashi Hospital, Internal Medicine                                          | 18/FEB/2015                             |
| The IRB of International University of health and welfare<br>Kyusu area<br><br>3-6-45, Sawara-ku,Momochihama<br>Fukuoka, Fukuoka<br>814-0001<br>Japan | Fukuoka Sanno Hospital, Department of respiratory<br>medicine                       | 12/FEB/2015                             |
| The IRB of Japanese Red Cross Nagasaki Genbaku<br>Isahaya Hospital                                                                                    | Japanese Red Cross Nagasaki Genbaku Isahaya<br>Hospital, Respiratory Medicine       | 20/FEB/2015                             |

| IRB or IEC (name/address)                                                                                                           | Center                                                                                | Date of Final Approval<br>(DD/MMM/YYYY) |
|-------------------------------------------------------------------------------------------------------------------------------------|---------------------------------------------------------------------------------------|-----------------------------------------|
| 986-2, Keya, Tarami-cho<br>Nagasaki, Isahaya<br>859-0497<br>Japan                                                                   |                                                                                       |                                         |
| The IRB of Kagoshima University Medical And Dental Hospital<br><br>8-35-1, Sakuragaoka<br>Kagoshima, Kagoshima<br>890-8520<br>Japan | Kagoshima University Medical And Dental Hospital,<br>Department of Pulmonary Medicine | 23/FEB/2015                             |
| The IRB of Nihonbashi Sakura Clinic<br><br>1-9-2, Kayaba-cho, Nihonbashi,<br>Tokyo, Chuo<br>103-0025<br>Japan                       | Healthcare corporation H.S.R Nakamura clinic,<br>Internal Medicine                    | 18/FEB/2015                             |
| The IRB of Okinawa Prefectural Chubu Hospital<br><br>281, aza-Miyazato<br>Okinawa, Uruma<br>904-2293<br>Japan                       | Okinawa Prefectural Chubu Hospital, Respiratory<br>Medicine                           | 17/FEB/2015                             |
| The IRB of Showa University Hospital                                                                                                | Showa University Hospital, Clinical Trial Support<br>Center                           | 27/JUL/2015                             |

| IRB or IEC (name/address)                                                                                          | Center                                                                                       | Date of Final Approval<br>(DD/MMM/YYYY) |
|--------------------------------------------------------------------------------------------------------------------|----------------------------------------------------------------------------------------------|-----------------------------------------|
| 1-5-8, Hatanodai<br>Tokyo, Shinagawa-ku<br>142-8666<br>Japan                                                       |                                                                                              |                                         |
| The IRB of Jichi Medical University Hospital<br><br>3311-1, Yakushiji<br>Tochigi, Shimotsuke<br>329-0498<br>Japan  | Jichi Medical University Hospital, Department of<br>Clinical Trial Promotion                 | 24/JUL/2015                             |
| The IRB of Yamagata University Hospital<br><br>2-2-2, Iidanishi<br>Yamagata, Yamagata<br>990-9585<br>Japan         | Yamagata University Hospital, Clinical Trial Center                                          | 01/SEP/2015                             |
| The IRB of Okayama University Hospital<br><br>2-5-1, Shikata-cho, Kita-ku<br>Okayama, Okayama<br>700-8558<br>Japan | Okayama University Hosipital, Division of Clinical<br>Research of New Drugs and Therapeutics | 21/JUL/2015                             |
| The IRB of Tokyo Women's Medical University Hospital<br><br>8-1, Kawada-cho                                        | Tokyo Women's Medical University<br>Hospital,Pulmonology                                     | 10/JUL/2015                             |

| IRB or IEC (name/address)                                                                                                                 | Center                                                                              | Date of Final Approval<br>(DD/MMM/YYYY) |
|-------------------------------------------------------------------------------------------------------------------------------------------|-------------------------------------------------------------------------------------|-----------------------------------------|
| Tokyo, Shinjuku-ku<br>162-8666<br>Japan                                                                                                   |                                                                                     |                                         |
| The IRB of Shiga University of Medical Science Hospital<br><br>Seta, Tsukinowa-cho<br>Shiga, Otsu<br>520-2192<br>Japan                    | Shiga University of Medical Science Hospital,<br>Respiratory Medicine               | 23/JUL/2015                             |
| The IRB of Tokyo Medical University Ibaraki Medical<br>Center<br><br>3-20-1, Chuo, Amimachi<br>Ibaraki, Inashiki-gun<br>300-0395<br>Japan | Tokyo Medical University Ibaraki Medical Center,<br>Respiratory Medicine            | 10/AUG/2015                             |
| The IRB of Kochi Medical School Hospital<br><br>185-1, Kohasu, Oko-cho<br>Kochi, Nankoku<br>783-8505<br>Japan                             | Kochi Medical School Hospital, Department of<br>Hematology and Respiratory Medicine | 28/SEP/2015                             |
